# Supplementary material
Source: PubMed Central journal article supplement (PMC6451881)
Supplement: NIHMS1519057-supplement-2.pdf [file NIHMS1519057-supplement-2.pdf]

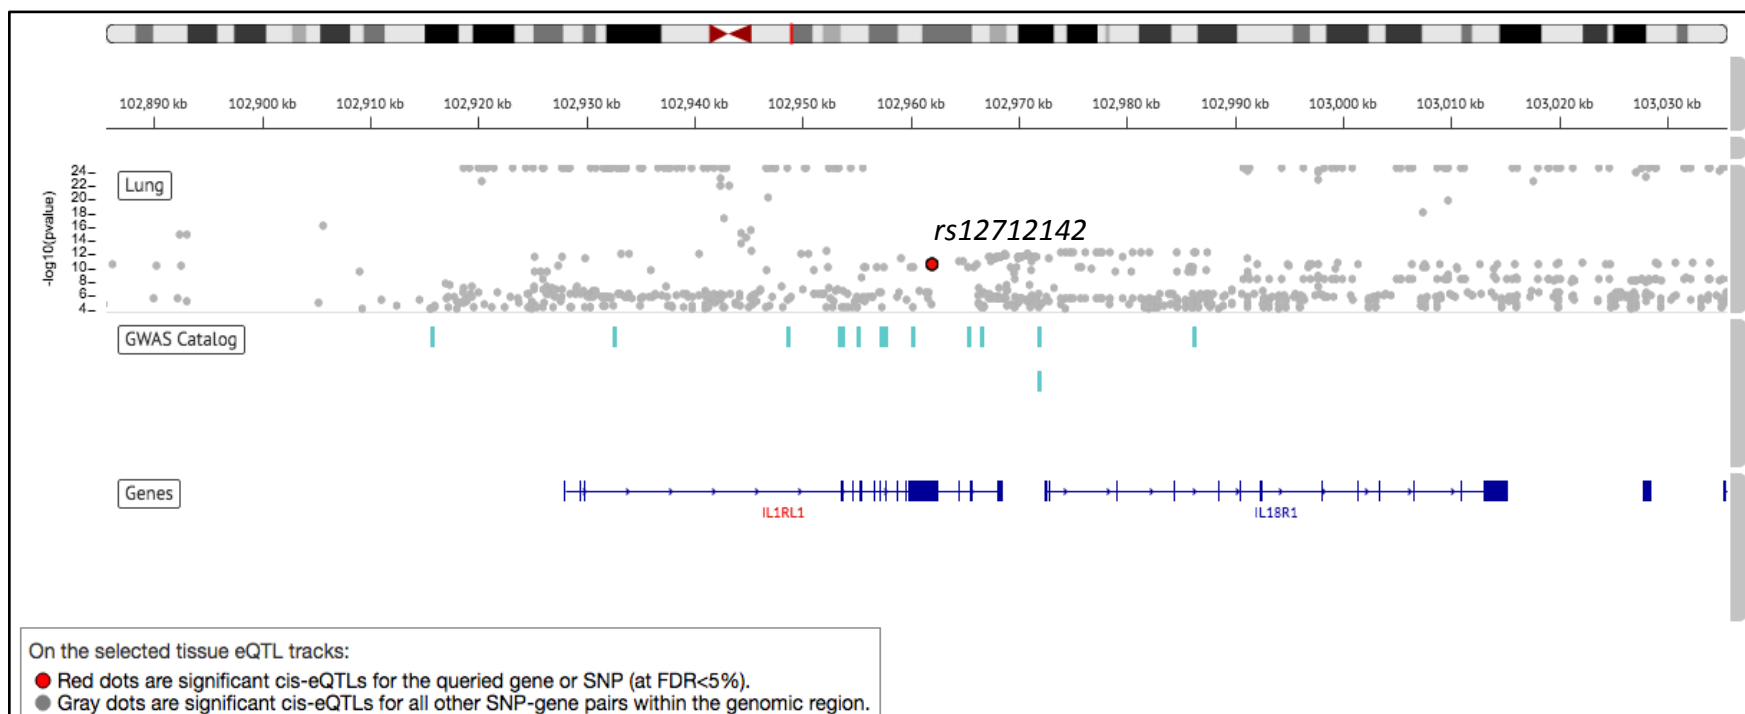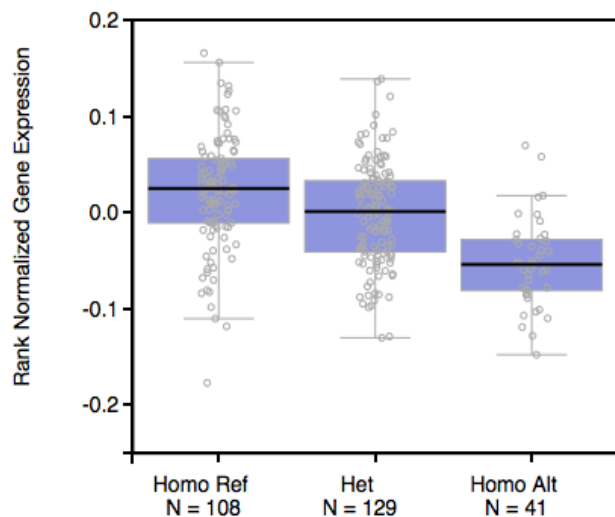

| miRNA           | Energy change (kcal/mol)       | miRNA/SNP-target duplexes                                                                                               | Effect by SNP on 3'UTR Binding Site |
|-----------------|--------------------------------|-------------------------------------------------------------------------------------------------------------------------|-------------------------------------|
| hsa-miR-892a    | Reference: -20.50<br>SNP: 0.00 | miRNA: 3' gaUGCGUCUU--CCUGUGUCAc 5'<br>                      X          <br>UTR: 5' aaAGGCAGGCACTTCA A ACAGTa 3'        | Loss                                |
| hsa-miR-452-5p  | Reference: 0.00<br>SNP: -19.30 | miRNA: 3' caaagGAGACGUUUGUCAa 5'<br>                                         <br>UTR: 5' gcaggCACTTC A AACAGTa 3'       | Gain                                |
| hsa-miR-4676-3p | Reference: 0.00<br>SNP: -16.90 | miRNA: 3' uucUCGGUCACCACUUUGUCAc 5'<br>                                         <br>UTR: 5' ggcAGGCACT--TCA A ACAGTa 3' | Gain                                |
| hsa-miR-892c-3p | Reference: 0.00<br>SNP: -17.00 | miRNA: 3' aggugagucuuuccUUUGUCAc 5'<br>                                         <br>UTR: 5' aaggcaggcacttc A AACAGTa 3' | Gain                                |
