# Supplementary material
Source: PubMed Central journal article supplement (PMC6451881)

# Chromosome 6

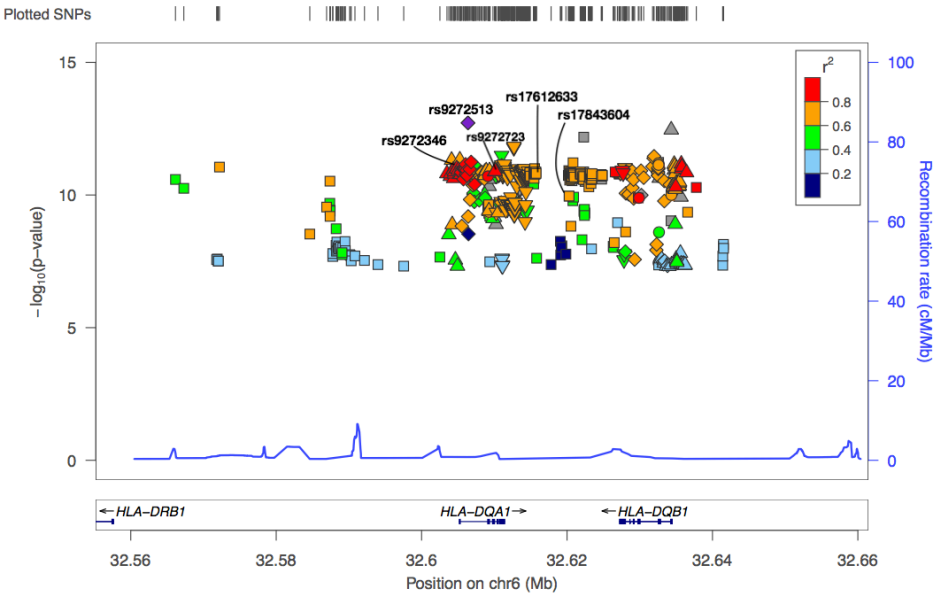

# Chromosome 2

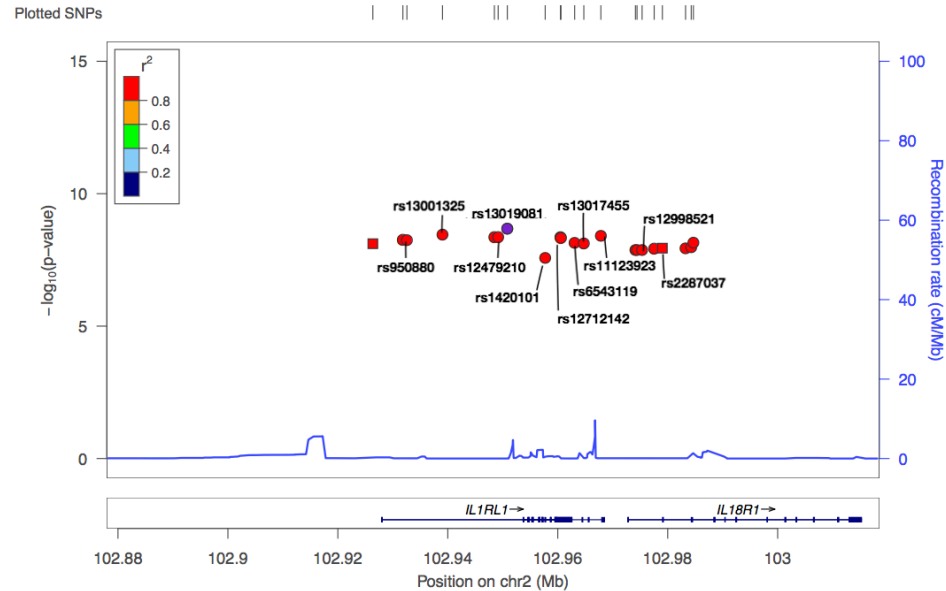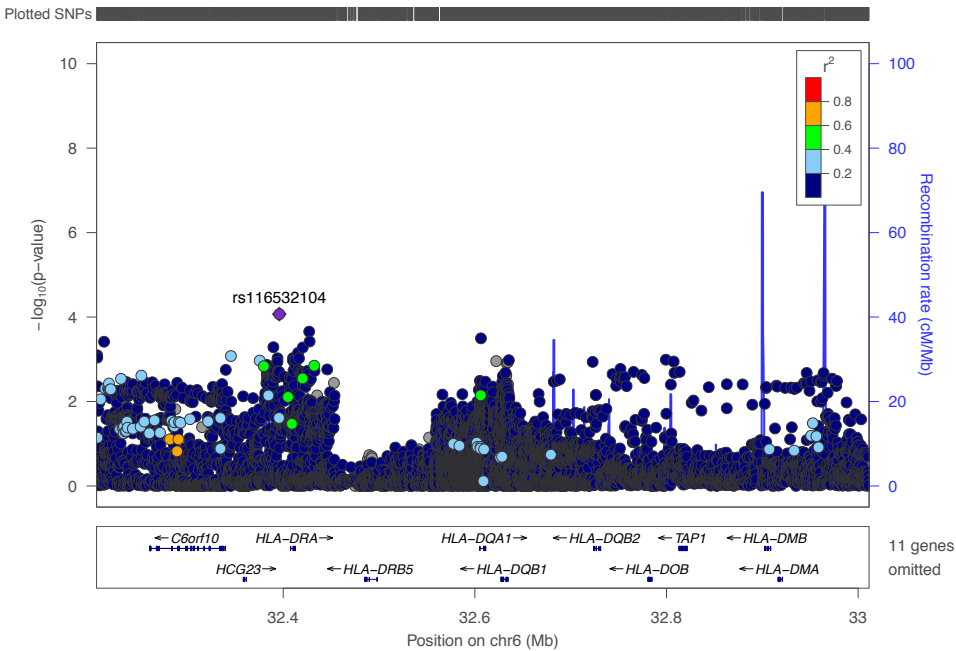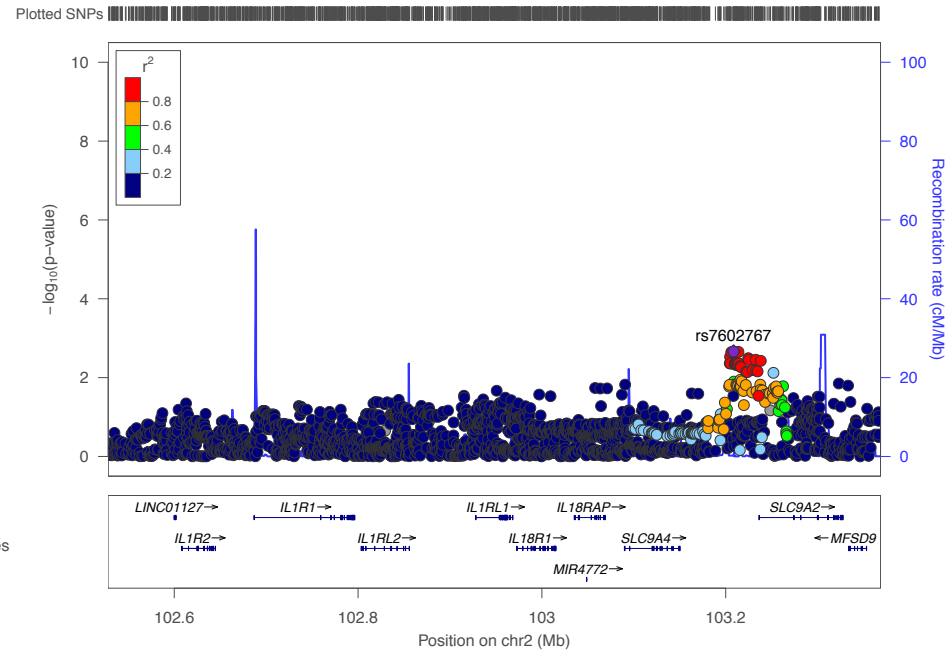

Supplement: NIHMS1519057-supplement-1.pdf [file NIHMS1519057-supplement-1.pdf]

Lung eQTL rs17843604 ENSG00000196735.7

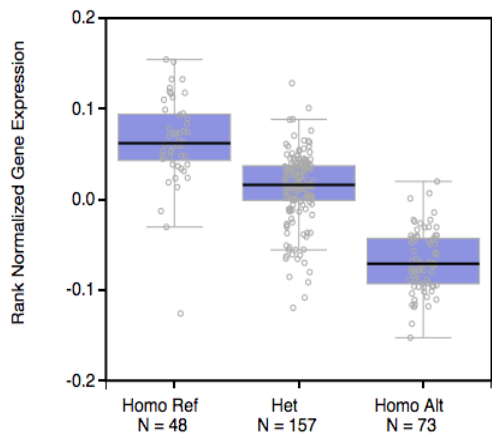

Lung eQTL rs1420101 ENSG00000115602.12

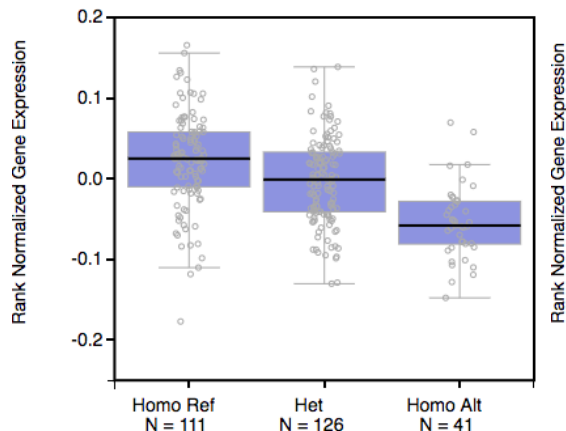

Lung eQTL rs12998521 ENSG00000115602.12

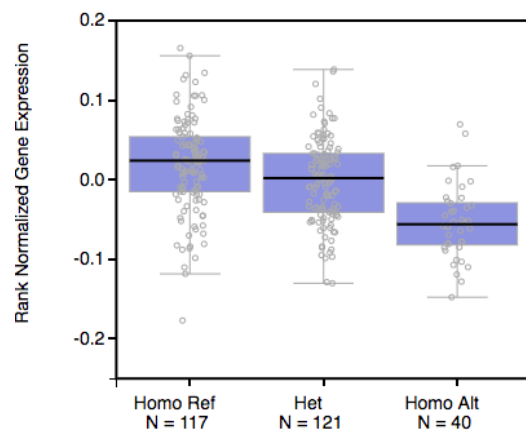

Lung eQTL rs9272723 ENSG00000196735.7

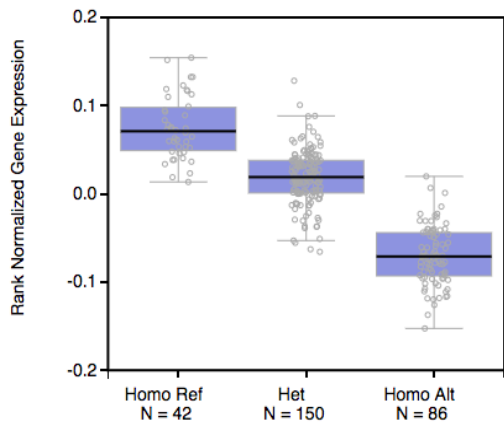

Lung eQTL rs9272346 ENSG00000196735.7

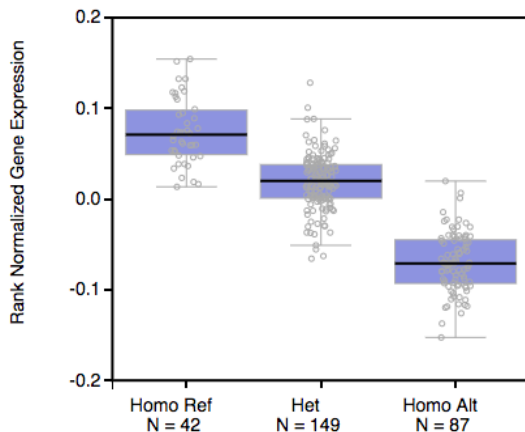

Supplement: NIHMS1519057-supplement-3.pdf [file NIHMS1519057-supplement-3.pdf]

**A.**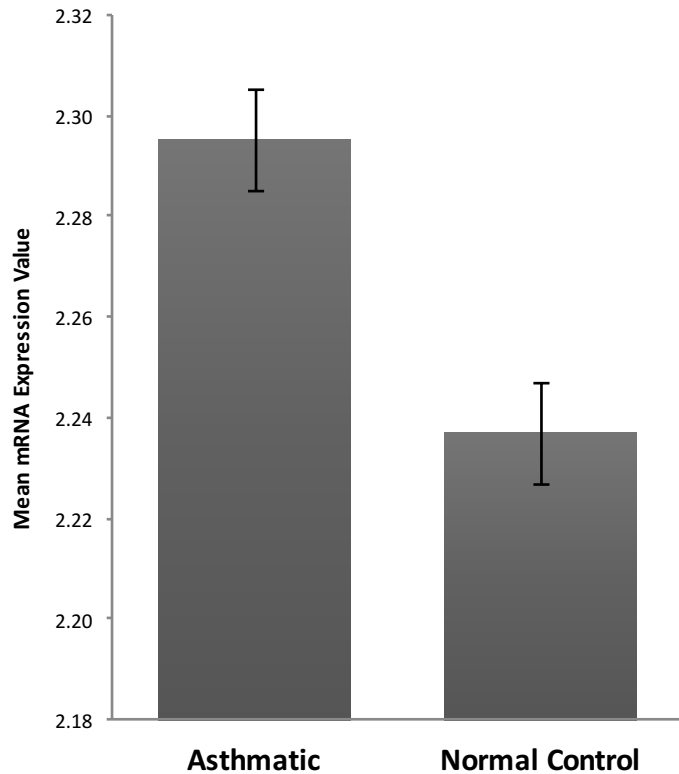**B.**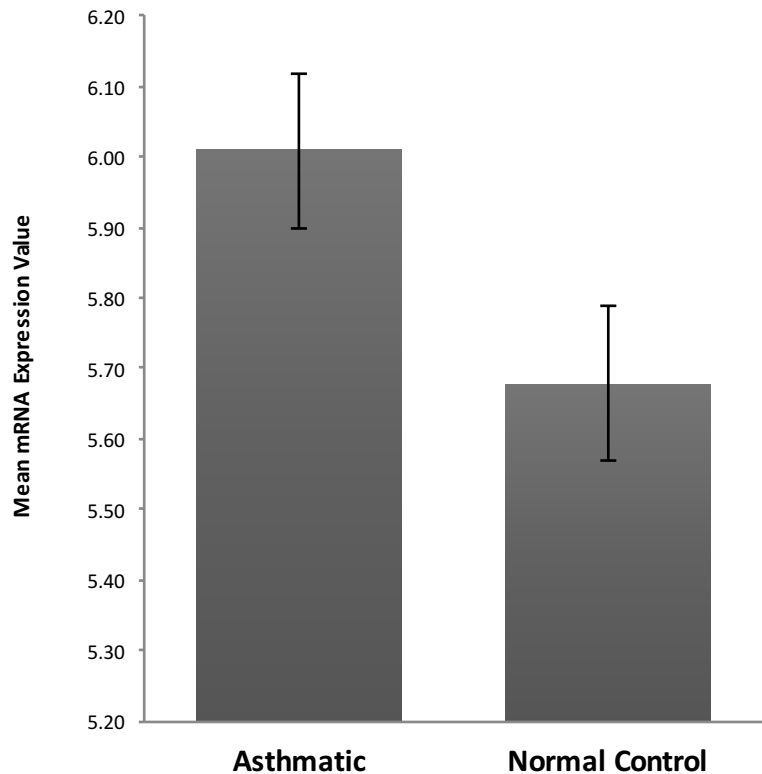

Supplement: NIHMS1519057-supplement-4.pdf [file NIHMS1519057-supplement-4.pdf]
